# Supplementary material
Source: PubMed Central journal article supplement (PMC3983014)
Supplement: ac4027669_si_001.pdf [file ac4027669_si_001.pdf]

## Supplementary materials

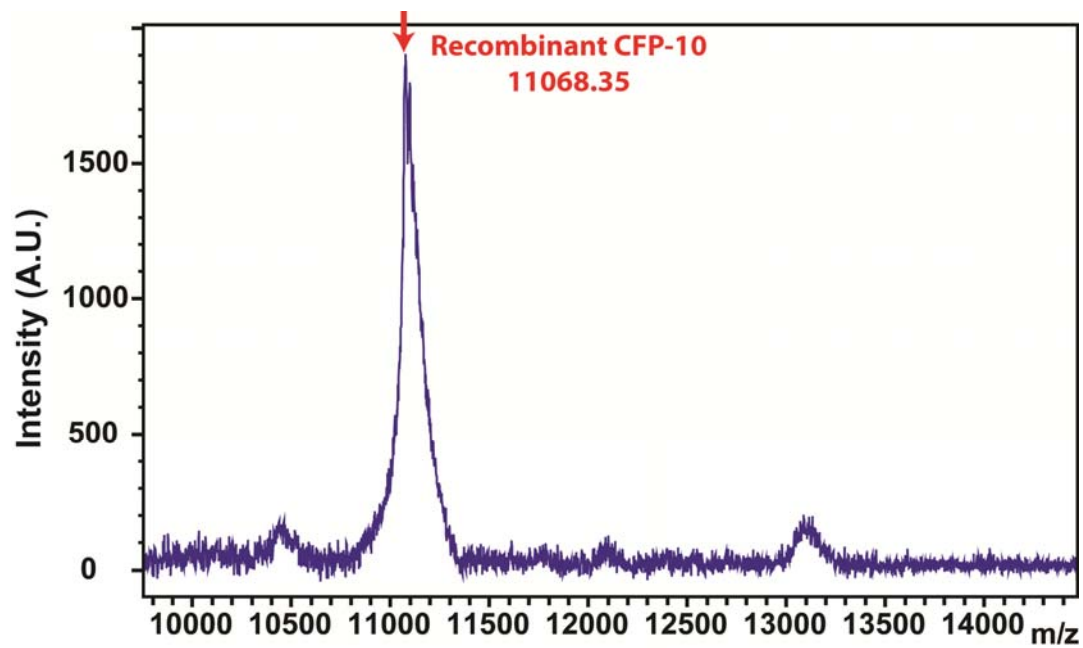

**Figure S1.** Mass spectrum of full length recombinant CFP-10 (5  $\mu$ M) collected in linear mode of MALDI-TOF MS. The molecular weight of recombinant, His-tagged CFP-10 is 11 kDa.

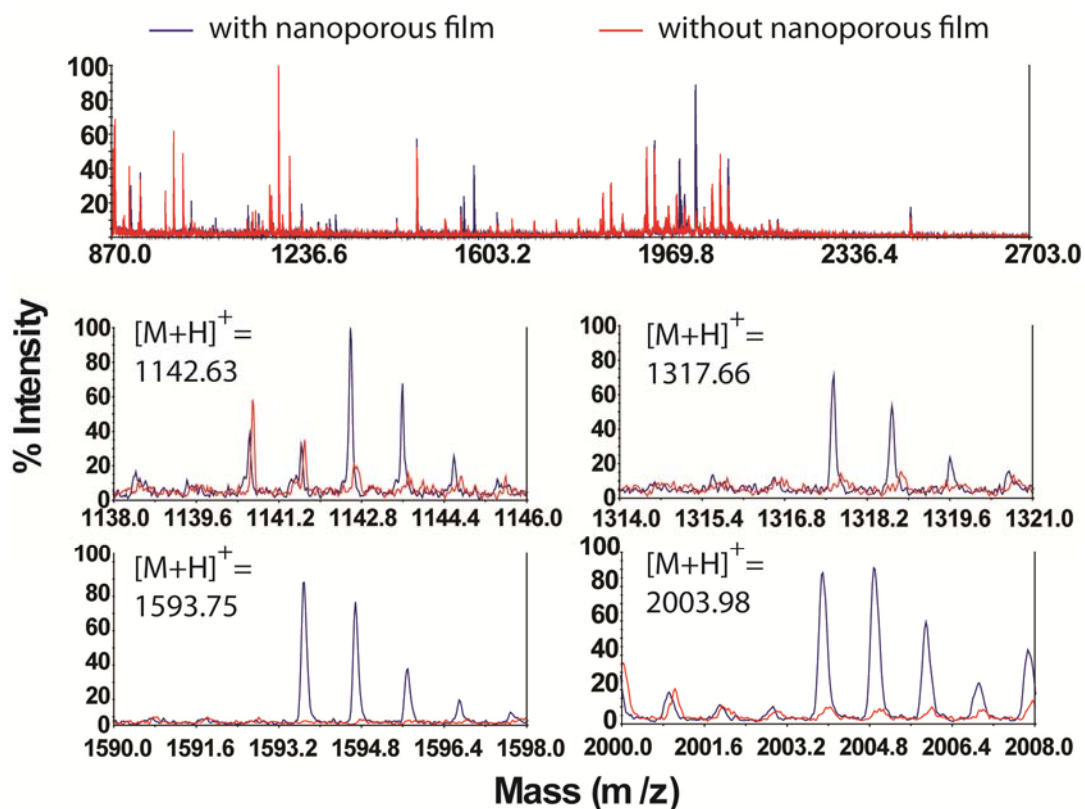

**Figure S2.** MALDI TOF MS analysis of culture media with or without on-chip fractionation. The top panel shows the overall mass spectra. The bottom panels represent the close-up spectra of CFP-10 fragments. Without prior on-chip processing of samples, signals from the major CFP-10 fragments were overshadowed by other abundant species in solution. With fractionation, the enriched major CFP-10 peaks became more evident and crisp in the mass spectrum. The observed multiple peaks in mass spectra with 1Da difference are caused by the isotope of carbon ( $^{13}\text{C}$ ) in nature.

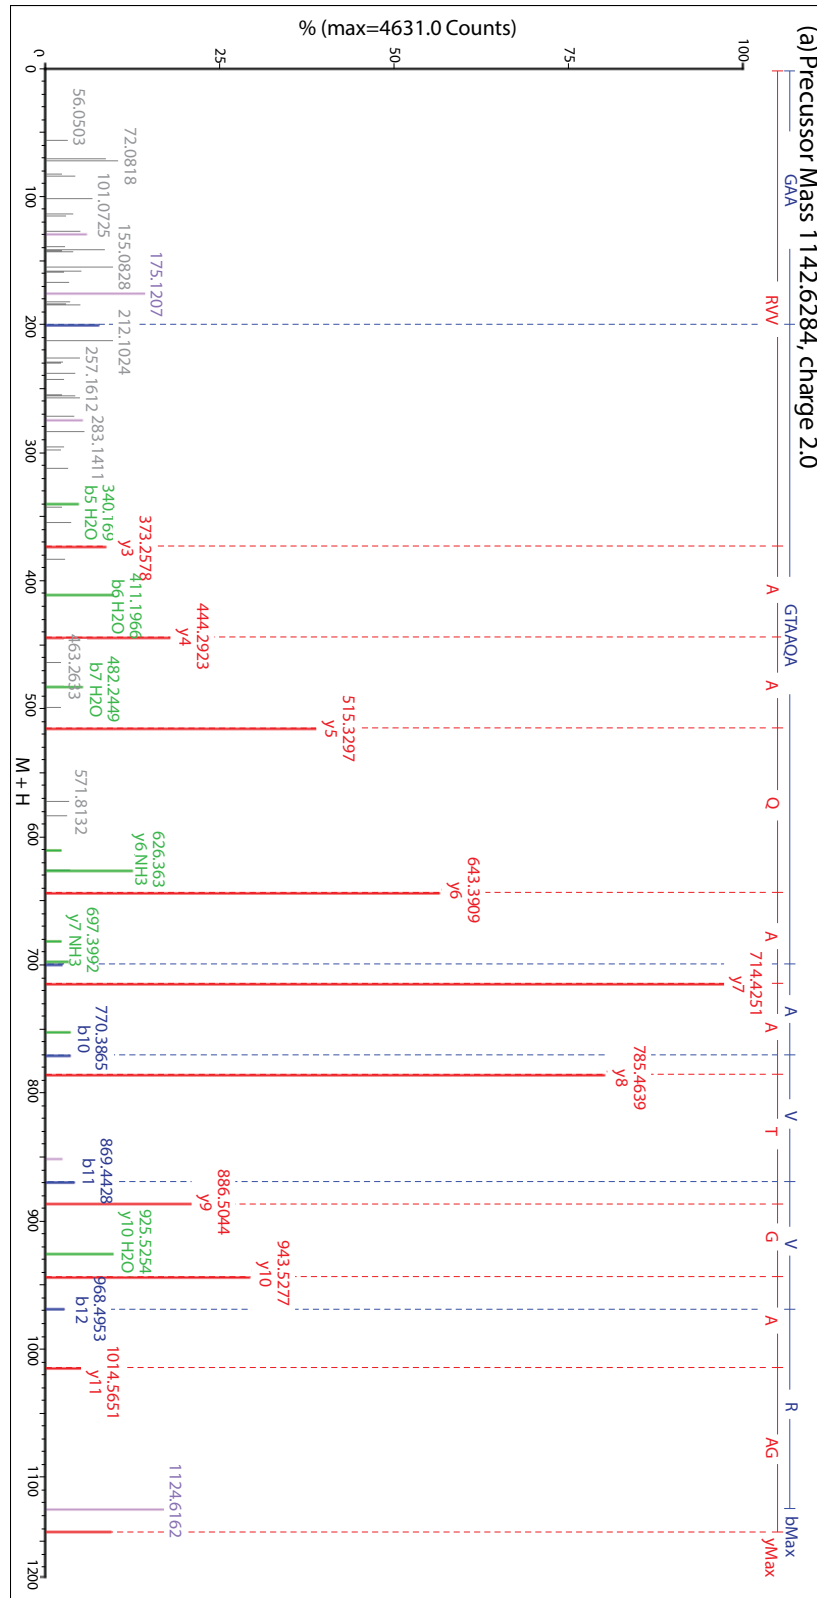

Figure S3 (a). LC-MS/MS spectra of recombinant CFP-10 fragments ( $[M+H]^+ = 1142.63$ ).

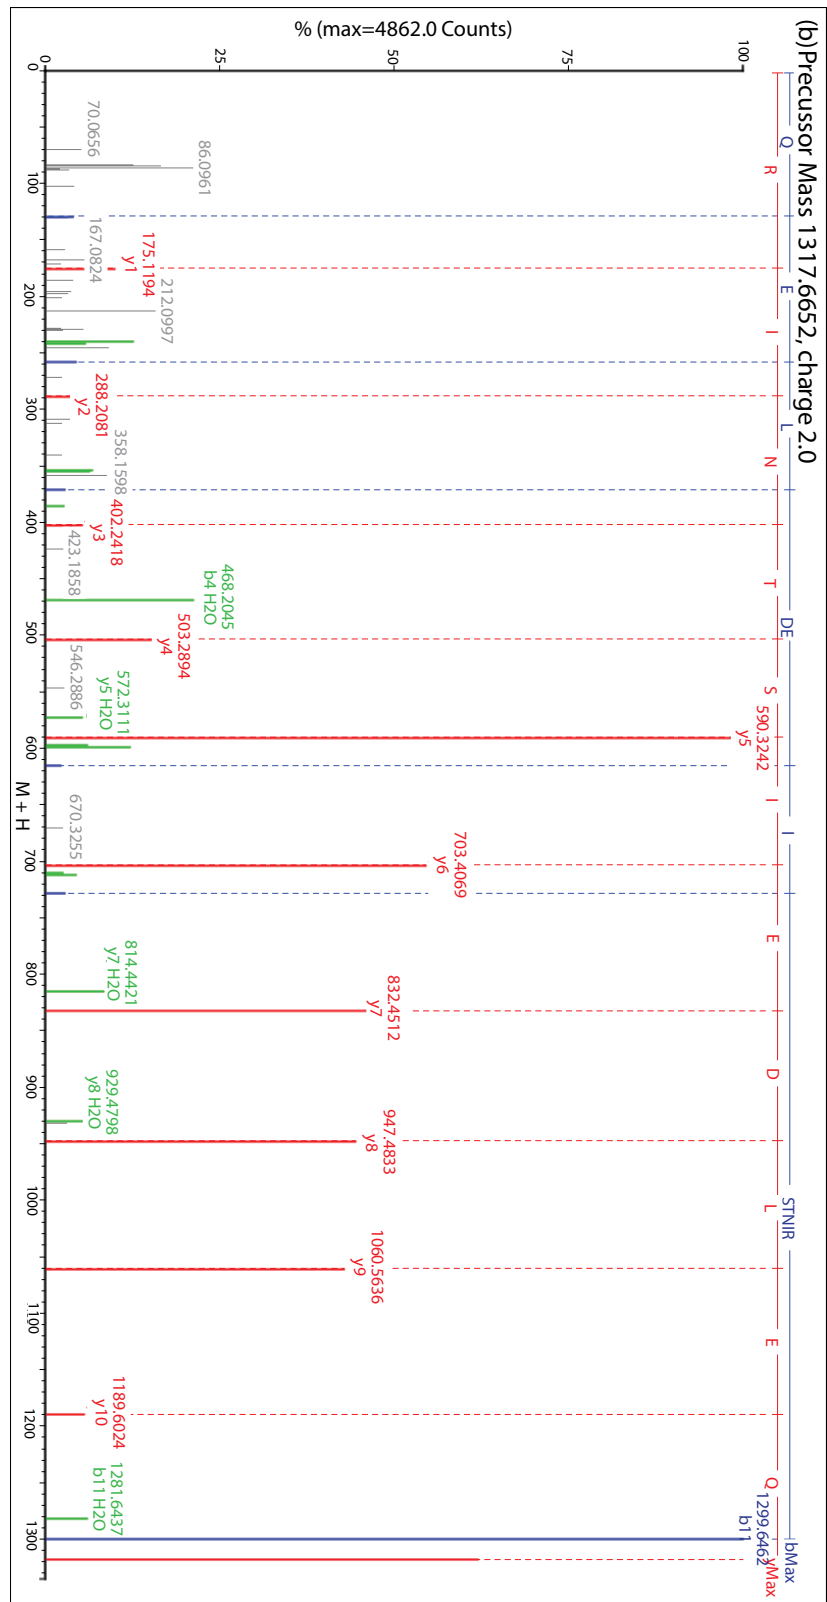

Figure S3 (b). LC-MS/MS spectra of recombinant CFP-10 fragments ( $[M+H]^+=1317.66$ ).

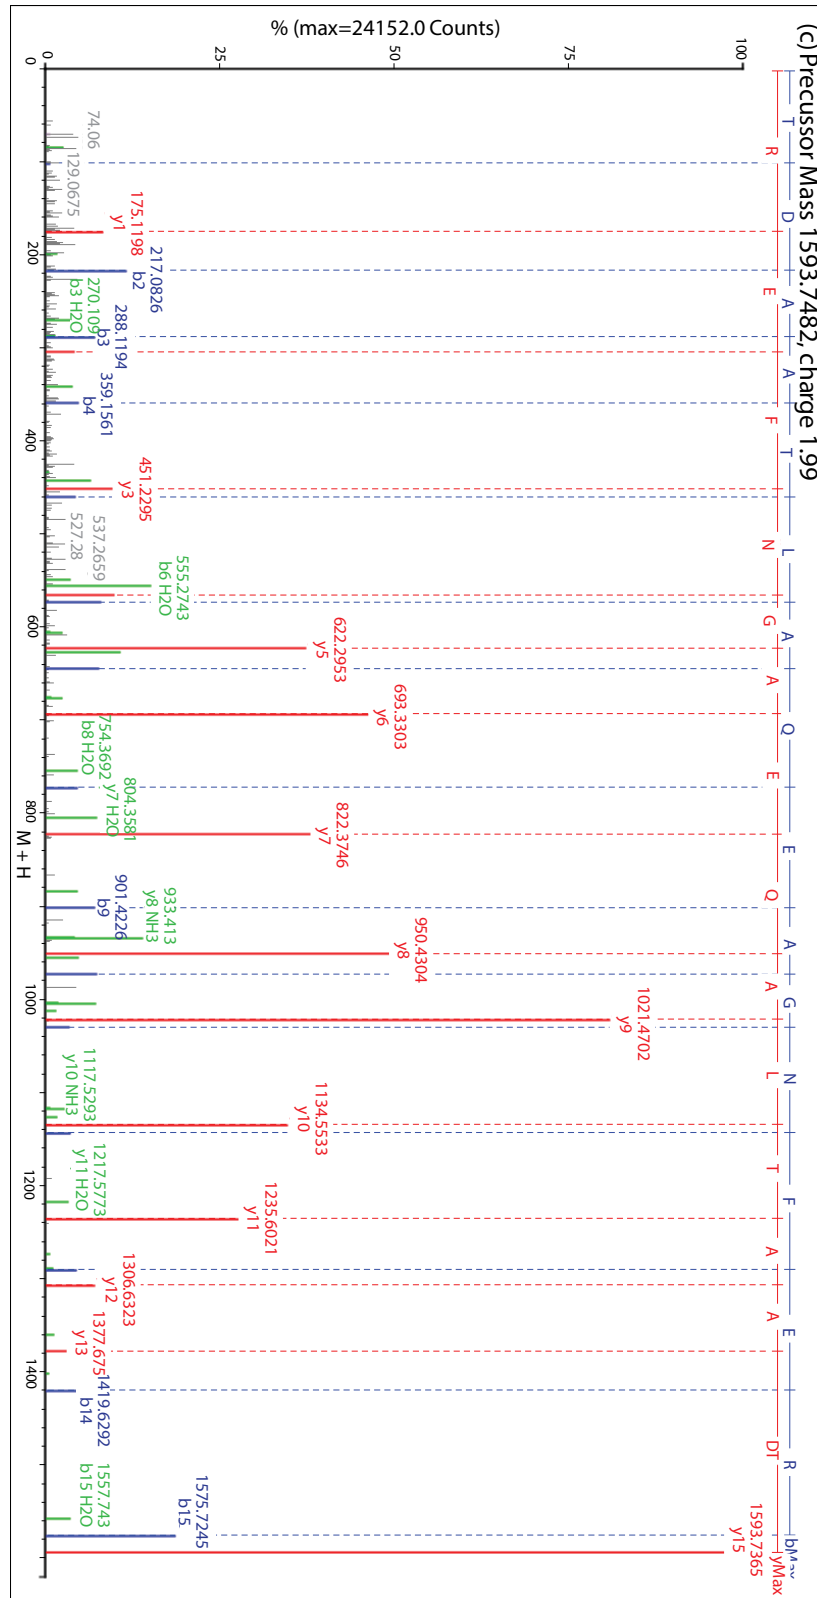

Figure S3 (c). LC-MS/MS spectra of recombinant CFP-10 fragments ( $[M+H]^+=1593.75$ ).

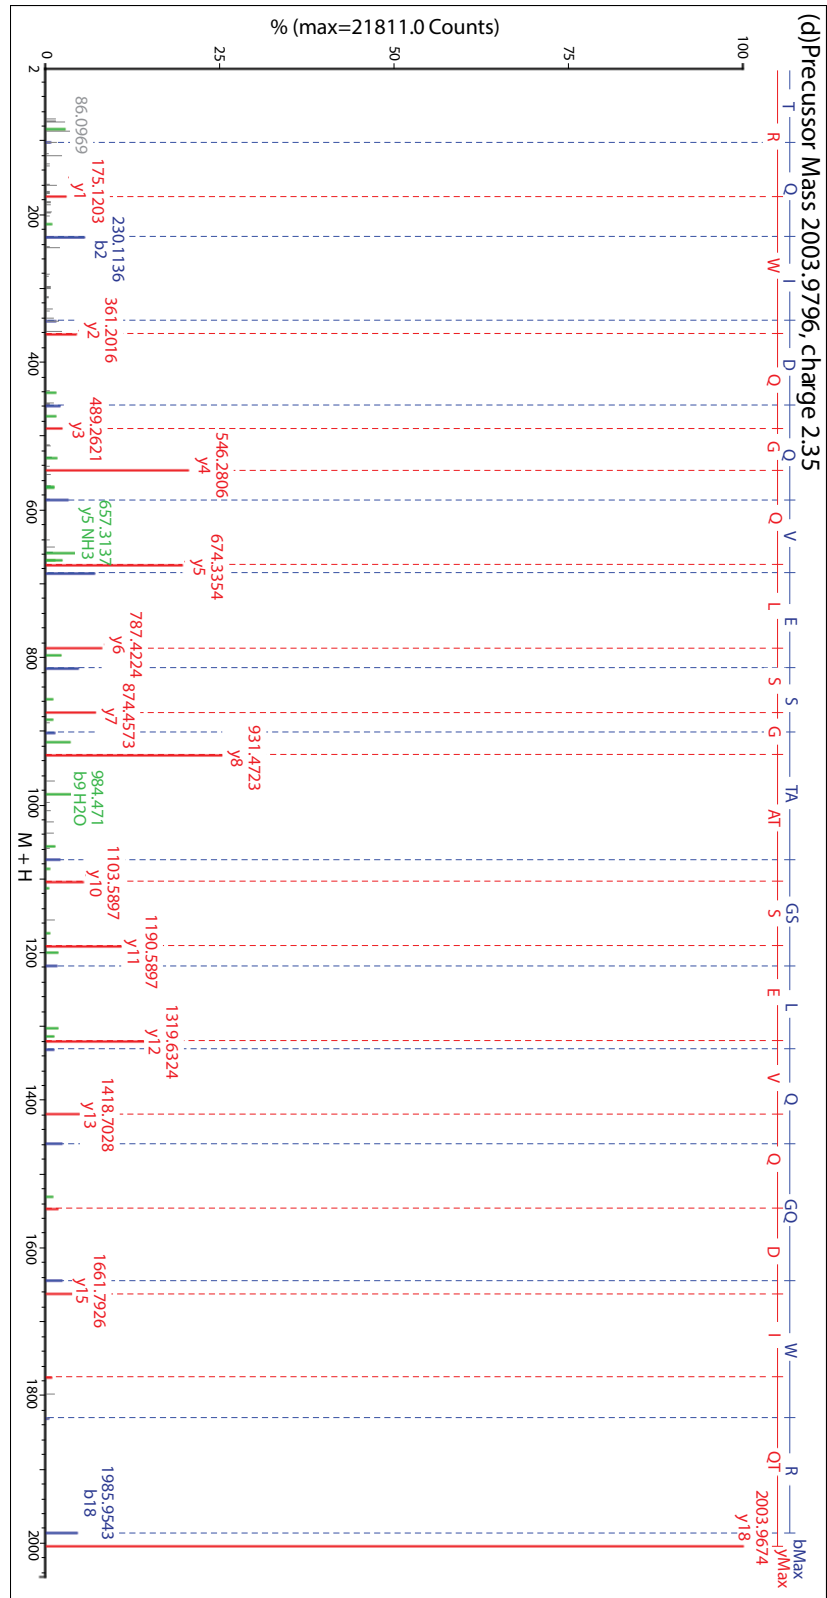

Figure S3 (d). LC-MS/MS spectra of recombinant CFP-10 fragments ( $[M+H]^+=2003.98$ ).

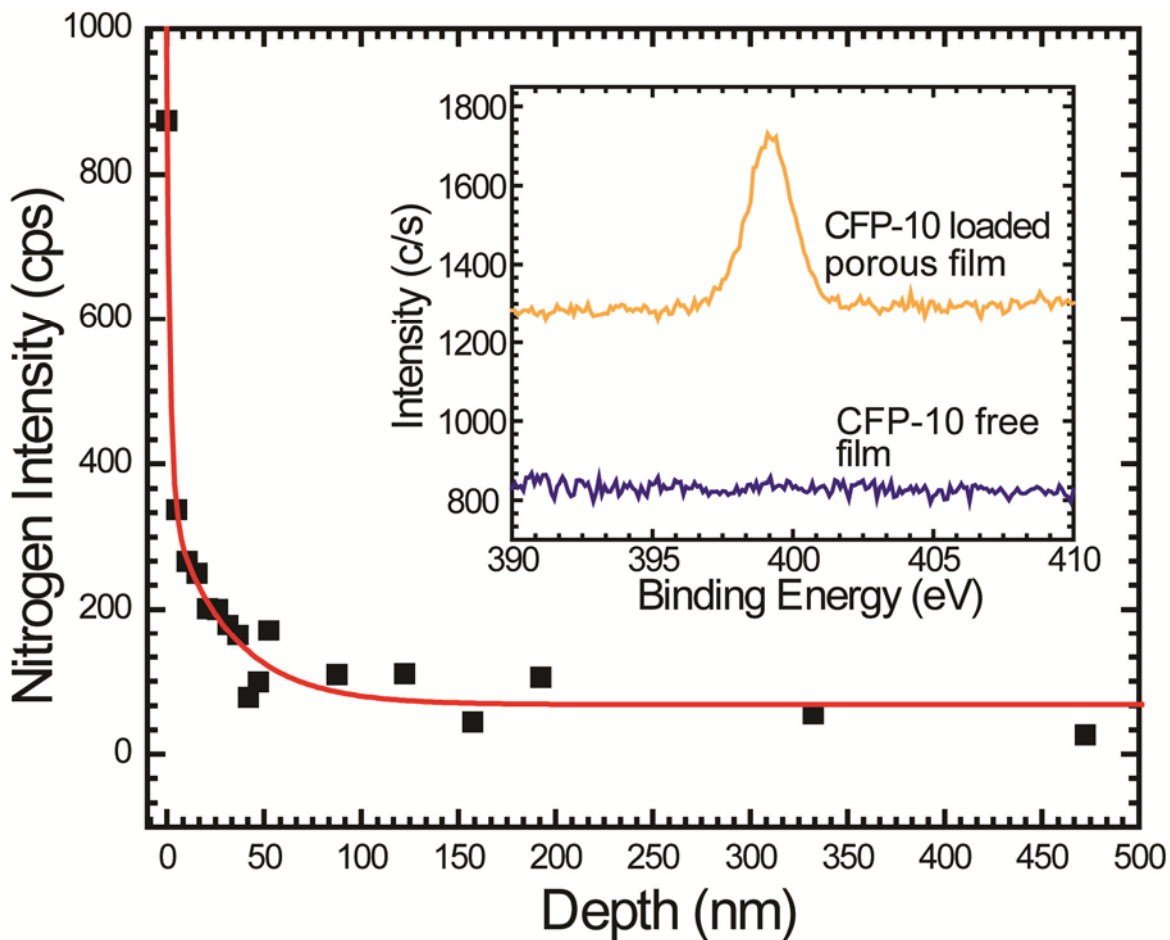

**Figure S4.** The depth profiles of CFP-10 enriched on L121+25% PPG, as determined from the N1s spectrum collected using XPS (described in Supporting Methods). The line represent the exponential fit of  $y=y_0+A \cdot \exp(-x/B)+C \cdot \exp(-x/D)$ . CFP-10 could penetrate 100nm into the film. The inset shows representative XPS N1S spectra of nanoporous film with and without CFP-10.

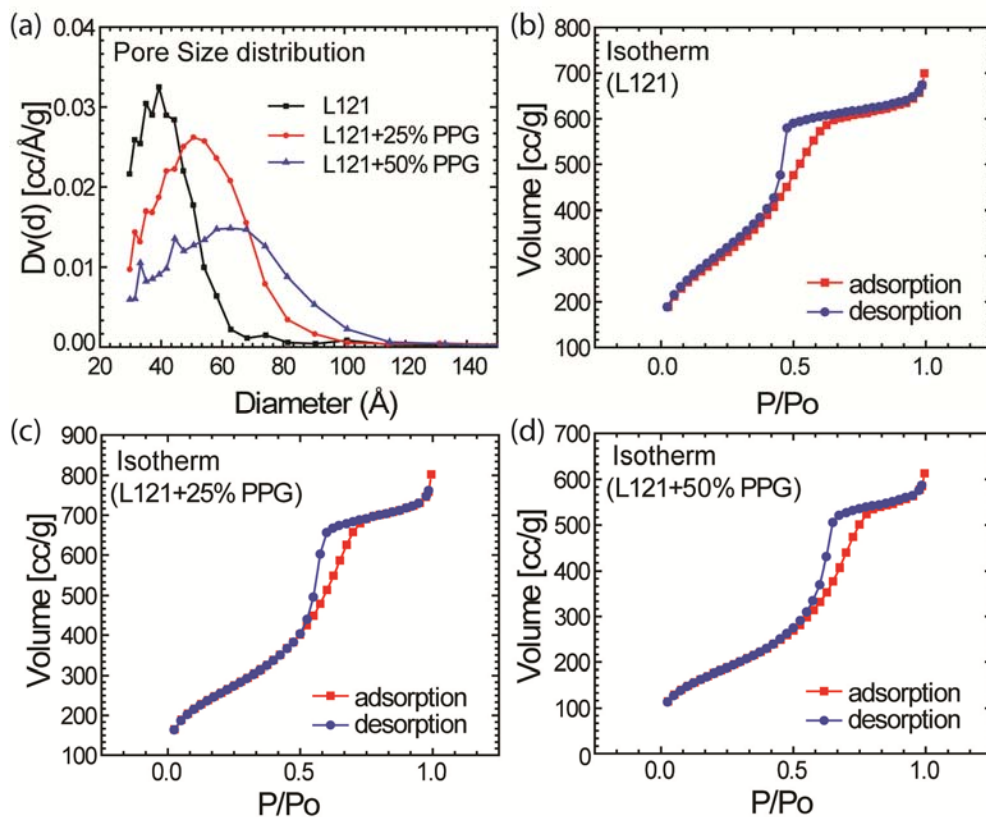

**Figure S5.** BET measurement. (a) The pore size distributions of different nanoporous film determined by  $N_2$  adsorption analysis. (b)-(d)  $N_2$  adsorption/desorption isotherms for L121, L121+25% PPG, and L121+50% PPG, respectively.



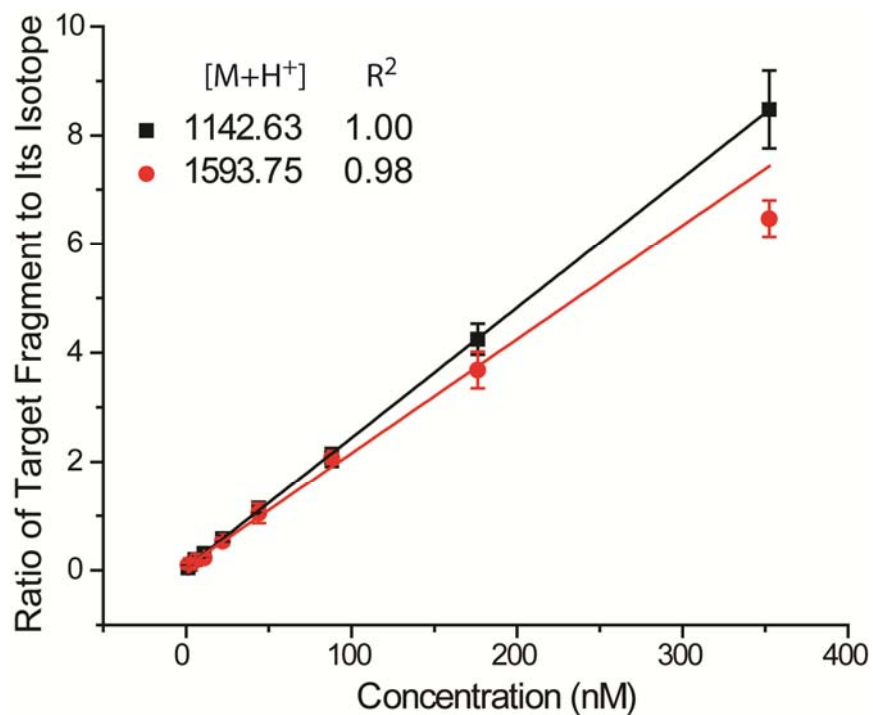

**Figure S6.** The relative intensity of each major CFP-10 fragment to its isotopic fragment is plotted versus the input CFP-10 concentration. The isotopic  $^{18}\text{O}$ -labeled fragments were generated by trypsin digestion in  $\text{H}_2^{18}\text{O}$ . Isotopic CFP-10 at 42 nM of was added in equal proportion to known digested CFP-10 before spiking on MALDI MS plate. In this condition, the 1142.63 and 1593.75 fragments show good linear relation with their respective isotopic fragments below 400 nM.

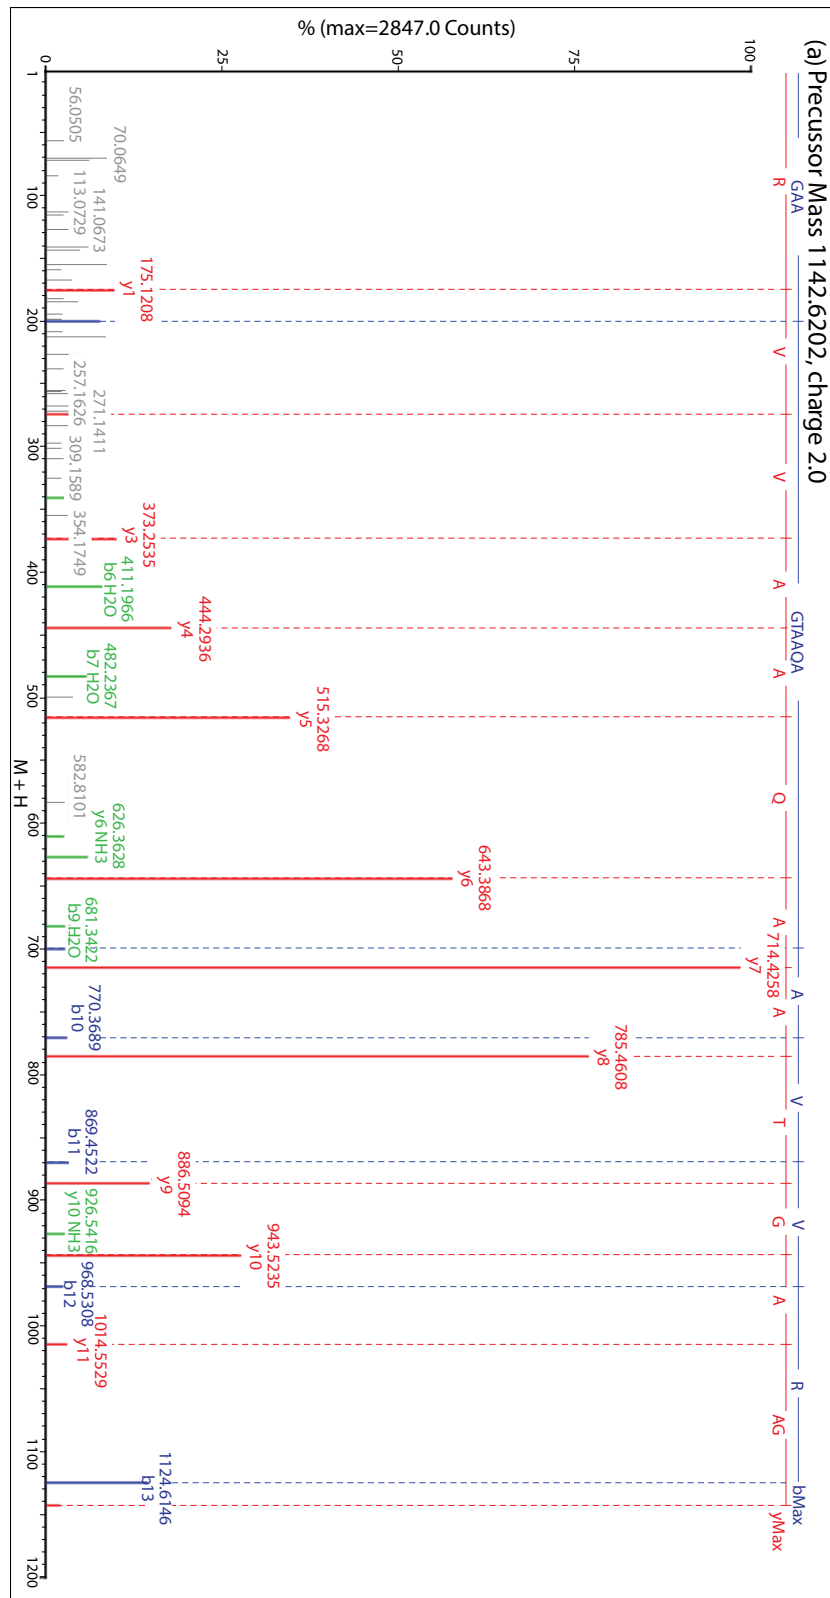

**Figure S7 (a).** LC-MS/MS spectra of CFP-10 fragments from MTB culture media ( $[M+H]^+=1142.63$ ).

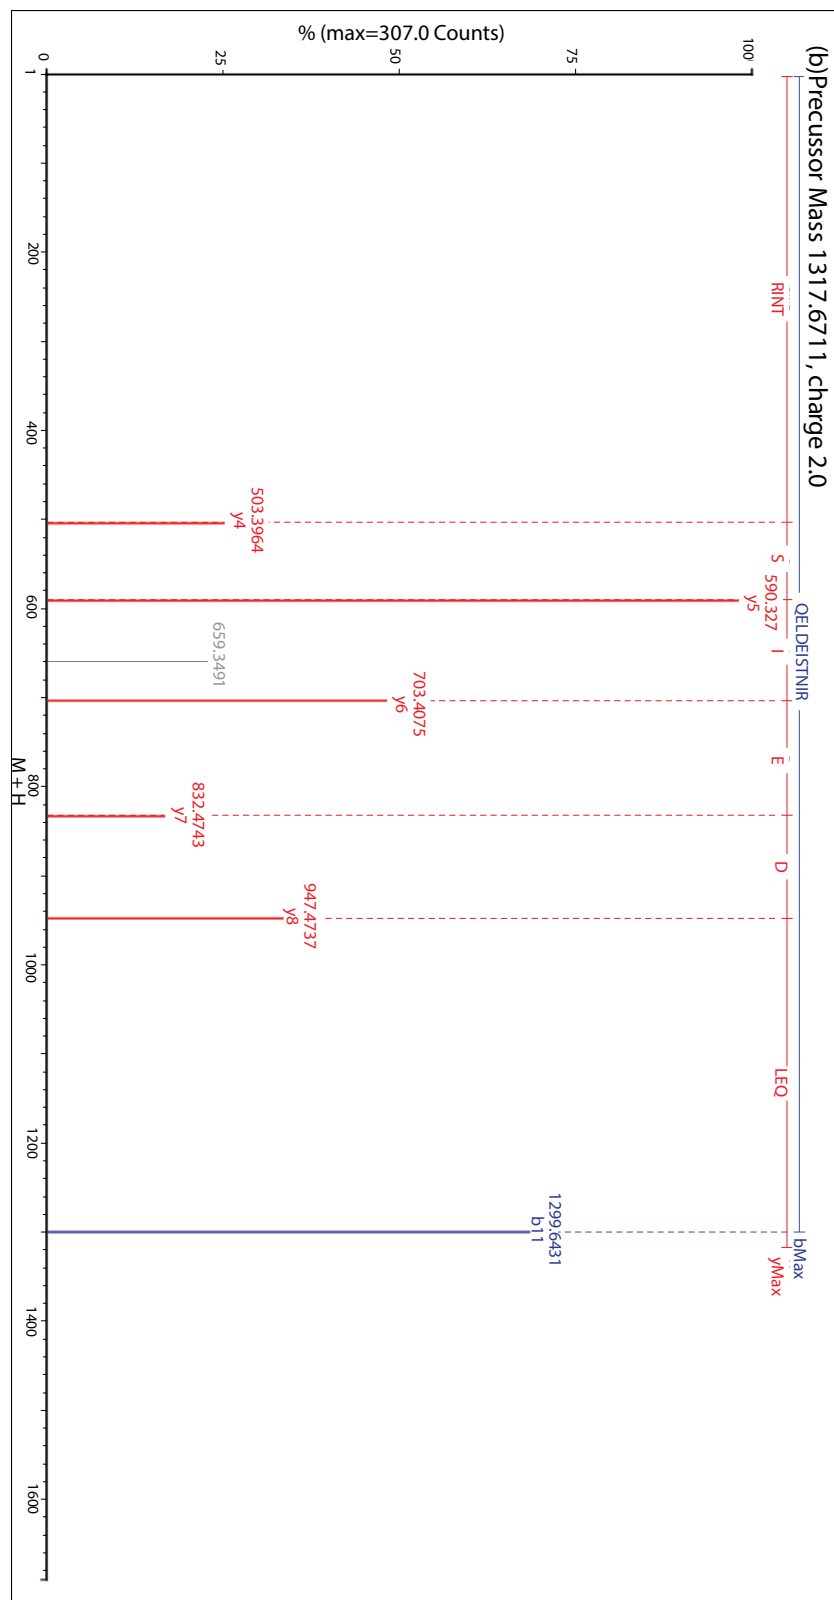

**Figure S7 (b).** LC-MS/MS spectra of CFP-10 fragments from MTB culture media ( $[M+H]^+ = 1317.66$ ).

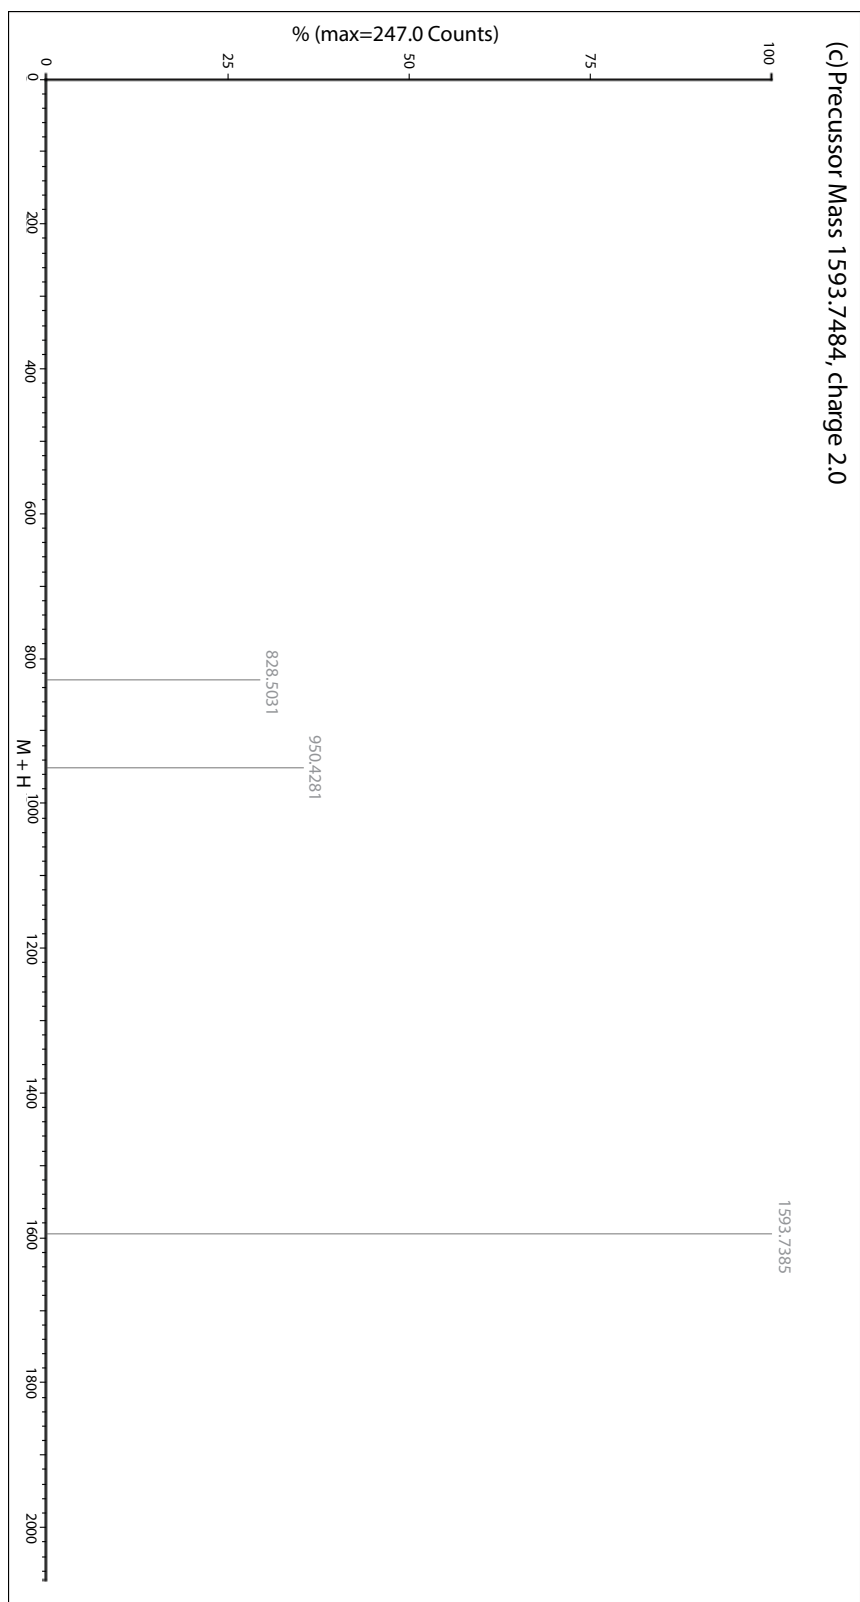

**Figure S7 (c).** LC-MS/MS spectra of CFP-10 fragments from MTB culture media ( $[M+H]^+=1593.75$ ).

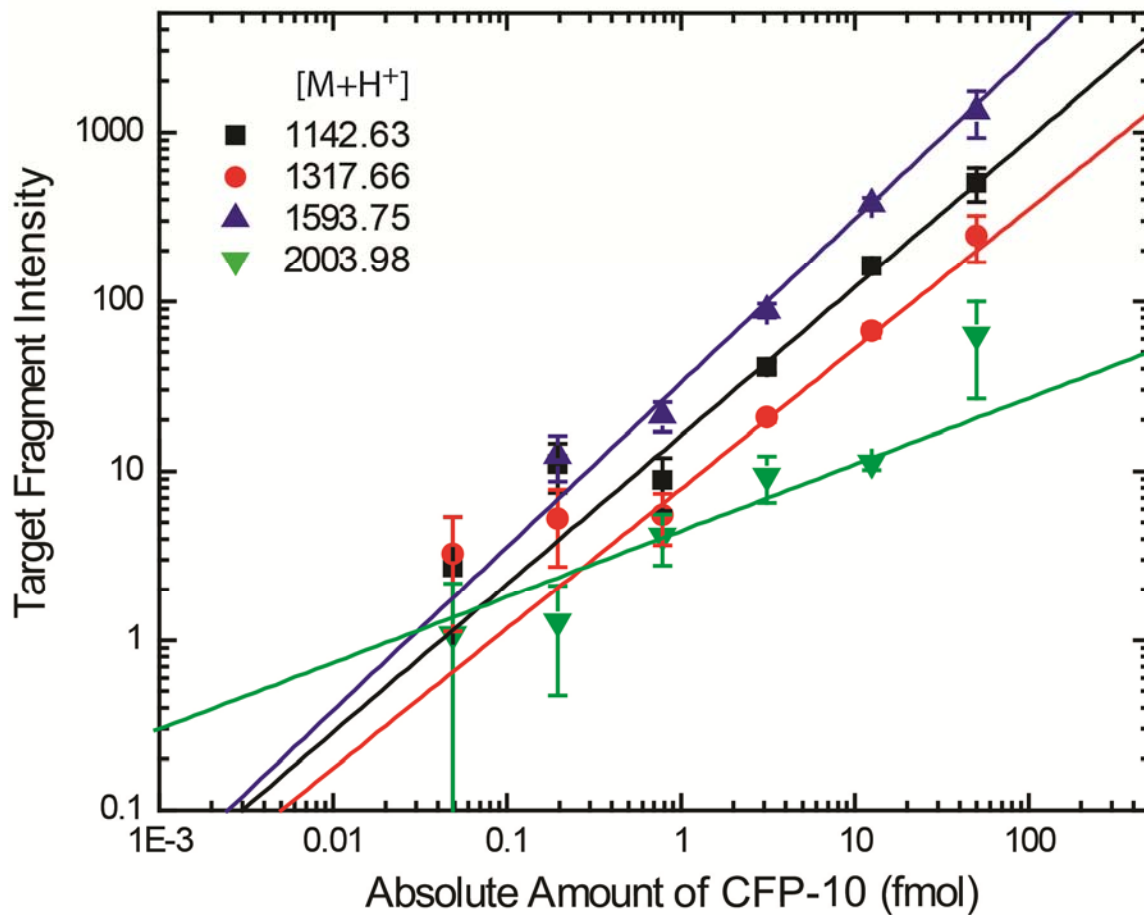

**Figure S8.** Titrating the detection curve for major CFP-10 fragments by MALDI TOF MS. 0.5 $\mu$ l of each known concentration of digested CFP-10 fragments were spotted on the MALDI TOF MS target plate. Under the operating conditions specified in Methods, we were able to detect the presence of CFP-10 at an amount as low as 0.2 fmol. [Average intensities are above background cut-off (mean of negative control + 3X standard deviation)].

**Table S1: Inter-day accuracy and reproducibility of CFP-10 on-chip fractionation-MS analysis (1317.664 & 2003.978 fragments)**

| concentration (nM) | N | Fragments | Mean (ug/ml) | Standard Deviation | Precision (CV) | Accuracy (RE) |
|--------------------|---|-----------|--------------|--------------------|----------------|---------------|
| 90.3               | 5 | 1317.664  | 1.7127       | 0.9940             | 58.03%         | 71.27%        |
|                    |   | 2003.978  | 0.0559       | 0.0351             | 62.66%         | 94.41%        |
| 11.3               | 5 | 1317.664  | 0.1361       | 0.0998             | 73.33%         | 8.91%         |
|                    |   | 2003.978  | 0.0559       | 0.0351             | 62.66%         | 55.24%        |
| 1.4                | 5 | 1317.664  | 0.6532       | 0.4959             | 75.91%         | 4080.41%      |
|                    |   | 2003.978  | 0.0031       | 0.0030             | 97.31%         | 80.20%        |

**Table S2: Intra-day accuracy and reproducibility of CFP-10 on-chip fractionation-MS analysis. (1317.664 & 2003.978 fragments)**

| concentration (nM) | N | Fragments | Mean (ug/ml) | Standard Deviation | Precision (%CV) | Accuracy (%RE) |
|--------------------|---|-----------|--------------|--------------------|-----------------|----------------|
| 90.3               | 9 | 1317.664  | 1.2903       | 0.6716             | 52.05%          | 29.03%         |
|                    |   | 2003.978  | 0.0732       | 0.0412             | 56.32%          | 92.68%         |
| 11.3               | 9 | 1317.664  | 146.5446     | 78.1665            | 53.34%          | 17.24%         |
|                    |   | 2003.978  | 0.0732       | 0.0412             | 61.74%          | 41.44%         |
| 1.4                | 9 | 1317.664  | 0.4283       | 0.4536             | 105.90%         | 2641.13%       |
|                    |   | 2003.978  | 0.0029       | 0.0033             | 112.94%         | 81.30%         |

**Table S3: The recipes of coating solution of various nanoporous films used in the paper.**

| Surfactant Polymer  | The amount of reactants in coating solution |              |             |         |
|---------------------|---------------------------------------------|--------------|-------------|---------|
|                     | Silicate sol solution (ml)                  | Ethanol (ml) | polymer (g) | PPG (g) |
| L121                | 10                                          | 5            | 1.2         | 0       |
| L121+25% PPG        | 10                                          | 10           | 1.2         | 0.3     |
| L121+25% PPG (thin) | 10                                          | 40           | 1.2         | 0.3     |
| L121+50% PPG        | 10                                          | 10           | 1.2         | 0.6     |
| L121+100% PPG       | 10                                          | 10           | 1.2         | 1.2     |
| F127 (2D hexagonal) | 7.5                                         | 10           | 1.8         | 0       |
| L64                 | 10                                          | 10           | 1.2         | 0       |

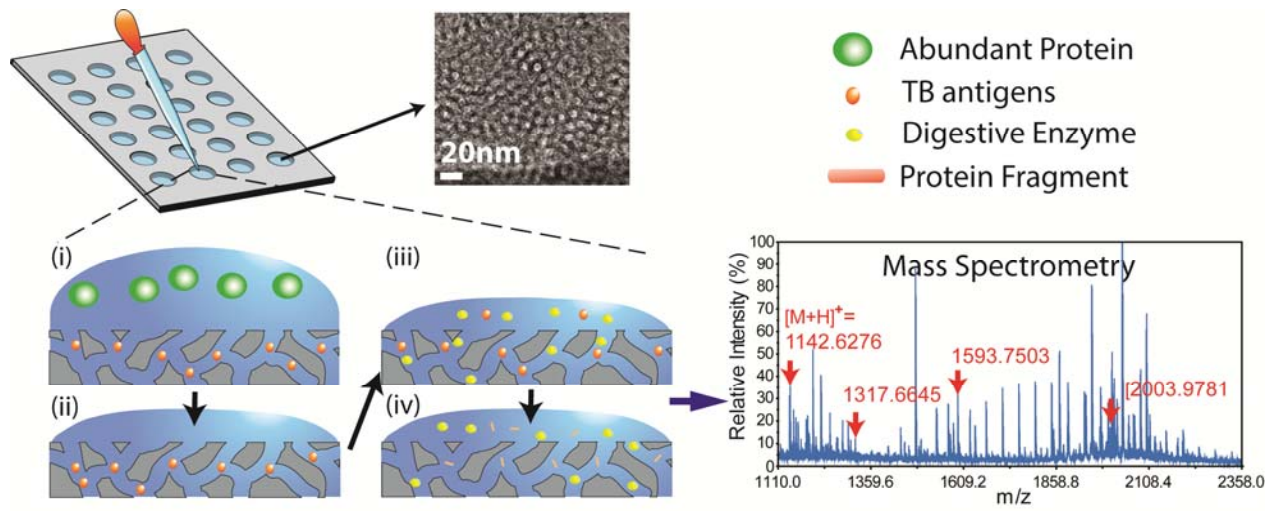

**Table of Content**
